# Supplementary material for: Structural and thermodynamical insights into the binding and inhibition of FIH-1 by the N-terminal disordered region of Mint3
Source: PubMed Central journal article supplement (PMC8571082; doi:10.1016/j.jbc.2021.101304), 2021-10-14
Supplement: mmc1.pdf [file mmc1.pdf]

## Supplementary Information

### **Structural and thermodynamical insights into the binding and inhibition of FIH-1 by the N-terminal disordered region of Mint3**

*Tensho Ten*<sup>1</sup>, *Satoru Nagatoishi*<sup>2\*</sup>, *Ryo Maeda*<sup>3</sup>, *Masaru Hoshino*<sup>3</sup>, *Yoshiaki Nakayama*<sup>4</sup>, *Motoharu Seiki*<sup>5</sup>, *Takeharu Sakamoto*<sup>6,7</sup>, *Kouhei Tsumoto*<sup>1,2,4\*</sup>

<sup>1</sup> Graduate School of Engineering, The University of Tokyo, 7-3-1 Hongo, Bunkyo-ku, Tokyo 113-8656, Japan.

<sup>2</sup> Project Division of Advanced Biopharmaceutical Science, The Institute of Medical Science, The University of Tokyo, 4-6-1 Shirokanedai, Minato-ku, Tokyo, 108-8639, Japan.

<sup>3</sup> Graduate School of Pharmaceutical Sciences, Kyoto University, 46-29 Yoshida-Shimoadachi, Sakyo-ku, Kyoto 606-8501, Japan.

<sup>4</sup> Graduate School of Frontier Sciences, The University of Tokyo, 4-6-1 Shirokanedai, Minato-ku, Tokyo, 108-8639, Japan

<sup>5</sup> Division of Cancer Cell Research, The Institute of Medical Science, The University of Tokyo, 4-6-1 Shirokanedai, Minato-ku, Tokyo, 108-8639, Japan.

<sup>6</sup> Department of System Biology, Institute of Medical, Pharmaceutical and Health Sciences, Kanazawa University, 13-1 Takaramachi, Kanazawa, Ishikawa, 920-8640, Japan.

<sup>7</sup> Department of Cancer Biology, Institute of Biomedical Science, Kansai Medical University, 2-5-1 Hirakata, Osaka, 537-1010, Japan.

## Table of Contents

|                                                                                                                                                                                                                                            |     |
|--------------------------------------------------------------------------------------------------------------------------------------------------------------------------------------------------------------------------------------------|-----|
| <b>Table S1.</b> HDX data summary.....                                                                                                                                                                                                     | S3  |
| <b>Table S2.</b> Thermodynamic parameters of the interaction between FIH-1 and Mint3NT/the deletion mutants.....                                                                                                                           | S6  |
| <b>Figure S1.</b> DSC profile of Mint3NT.....                                                                                                                                                                                              | S7  |
| <b>Figure S2.</b> Mint3NT or FIH-1 peptides observed during sequence identification runs mapped onto the amino acid sequence of the protein .....                                                                                          | S8  |
| <b>Figure S3.</b> $^1\text{H}$ - $^{15}\text{N}$ HSQC spectra of $^{15}\text{N}$ -Mint3NT in the absence and presence of unlabeled FIH-dimer.....                                                                                          | S12 |
| <b>Figure S4.</b> SEC-MALS profile of FIH-1.....                                                                                                                                                                                           | S13 |
| <b>Figure S5.</b> CD spectra of Mint3NT alone (red), FIH-1 alone (blue), complex between Mint3NT and FIH-1 (black), sum of spectra of Mint3NT and FIH-1 (dark gray), spectrum of the complex minus the spectrum of FIH-1 (white gray)..... | S14 |
| <b>Figure S6.</b> ITC profile of the interaction between FIH-1 and Mint3NTmut.....                                                                                                                                                         | S15 |
| <b>Figure S7.</b> Mutation site of L340R shown in red (PDB ID: 1MZF).....                                                                                                                                                                  | S16 |
| <b>Figure S8.</b> Melting curve of FIH-1 WT and FIH-1 L340R upon analysis using DSF.....                                                                                                                                                   | S17 |
| <b>Figure S9.</b> CD spectra of FIH-1 mutants.....                                                                                                                                                                                         | S18 |
| <b>Figure S10.</b> Size of the FIH-1 dimer.....                                                                                                                                                                                            | S19 |

**Table S1a.** HDX data summary of Figure 1c

|                                     |                                       |
|-------------------------------------|---------------------------------------|
| Data Set                            | Mint3NT                               |
| HDX reaction details                | Temperature 10 °C                     |
| HDX time course (sec)               | 60, 300, 600, 1800, 3600, 7200, 14400 |
| # of peptides                       | 150                                   |
| Sequence coverage                   | 93.78%                                |
| Average peptide length / Redundancy | 16.32 / 10.88                         |
| Replicates                          | 1                                     |

**Table S1b.** HDX data summary of Figure 3c

| Data Set                            | FIH-1 WT                              | FIH-1 L340R                           |
|-------------------------------------|---------------------------------------|---------------------------------------|
| HDX reaction details                | Temperature 10 °C                     | Temperature 10 °C                     |
| HDX time course (sec)               | 60, 300, 600, 1800, 3600, 7200, 14400 | 60, 300, 600, 1800, 3600, 7200, 14400 |
| # of peptides                       | 381                                   | 367                                   |
| Sequence coverage                   | 99.46%                                | 99.46%                                |
| Average peptide length / Redundancy | 13.14 / 13.54                         | 13.04 / 12.94                         |
| Replicates                          | 1                                     | 1                                     |

**Table S1c.** HDX data summary of Figure 4c

| Data Set                               | FIH-1 (-aKG)                       | FIH-1 (+aKG)                       |
|----------------------------------------|------------------------------------|------------------------------------|
| HDX reaction details                   | Temperature 10 °C                  | Temperature 10 °C                  |
| HDX time course (sec)                  | 60, 300, 600, 1800, 7200,<br>14400 | 60, 300, 600, 1800, 7200,<br>14400 |
| # of peptides                          | 259                                | 260                                |
| Sequence coverage                      | 93.70%                             | 93.70%                             |
| Average peptide length /<br>Redundancy | 16.10 / 11.95                      | 16.14 / 12.02                      |
| Replicates                             | 1                                  | 1                                  |

**Table S1d.** HDX data summary of Figure 5a

| Data Set                               | FIH-1 (-Mint3NT)          | FIH-1 (+Mint3NT)          |
|----------------------------------------|---------------------------|---------------------------|
| HDX reaction details                   | Temperature -5 °C         | Temperature -5 °C         |
| HDX time course (sec)                  | 30, 60, 90, 120, 300, 600 | 30, 60, 90, 120, 300, 600 |
| # of peptides                          | 331                       | 326                       |
| Sequence coverage                      | 99.19%                    | 99.19%                    |
| Average peptide length /<br>Redundancy | 15.11 / 13.52             | 15.19 / 13.38             |
| Replicates                             | 1                         | 1                         |

**Table S1e.** HDX data summary of Figure 6a

| Data Set                               | Mint3NT (-FIH1)                 | Mint3NT (+FIH1)                 |
|----------------------------------------|---------------------------------|---------------------------------|
| HDX reaction details                   | Temperature 10 °C               | Temperature 10 °C               |
| HDX time course (sec)                  | 30, 60, 90, 120, 300, 600, 1200 | 30, 60, 90, 120, 300, 600, 1200 |
| # of peptides                          | 191                             | 155                             |
| Sequence coverage                      | 100.00%                         | 100.00%                         |
| Average peptide length /<br>Redundancy | 16.20 / 13.75                   | 15.79 / 10.88                   |
| Replicates                             | 3                               | 3                               |
| Repeatability (avg. stddev<br>of #D)   | 0.2756                          | 0.3774                          |

**Table S2.** Thermodynamic parameters of the interaction between FIH-1 and Mint3NT/the deletion mutants

|            | $K_D$<br>( $\mu\text{M}$ ) | $\Delta G$<br>( $\text{kcal mol}^{-1}$ ) | $\Delta H$<br>( $\text{kcal mol}^{-1}$ ) | $-T\Delta S$<br>( $\text{kcal mol}^{-1}$ ) |
|------------|----------------------------|------------------------------------------|------------------------------------------|--------------------------------------------|
| 1-214 (NT) | $0.52 \pm 0.02$            | $-8.6 \pm 0.1$                           | $-32.2 \pm 0.7$                          | $23.6 \pm 0.8$                             |
| 1-117      | $0.65 \pm 0.07$            | $-8.4 \pm 0.1$                           | $-17.9 \pm 0.6$                          | $9.5 \pm 0.7$                              |
| 1-92       | $9.0 \pm 0.90$             | $-6.9 \pm 0.1$                           | $-14.3 \pm 1.4$                          | $7.4 \pm 1.4$                              |
| 93-117     | $3.0 \pm 0.60$             | $-7.5 \pm 0.1$                           | $-8.7 \pm 0.2$                           | $1.2 \pm 0.3$                              |
| 93-117mut  | n.d.                       | n.d.                                     | n.d.                                     | n.d.                                       |

n.d.: not determined

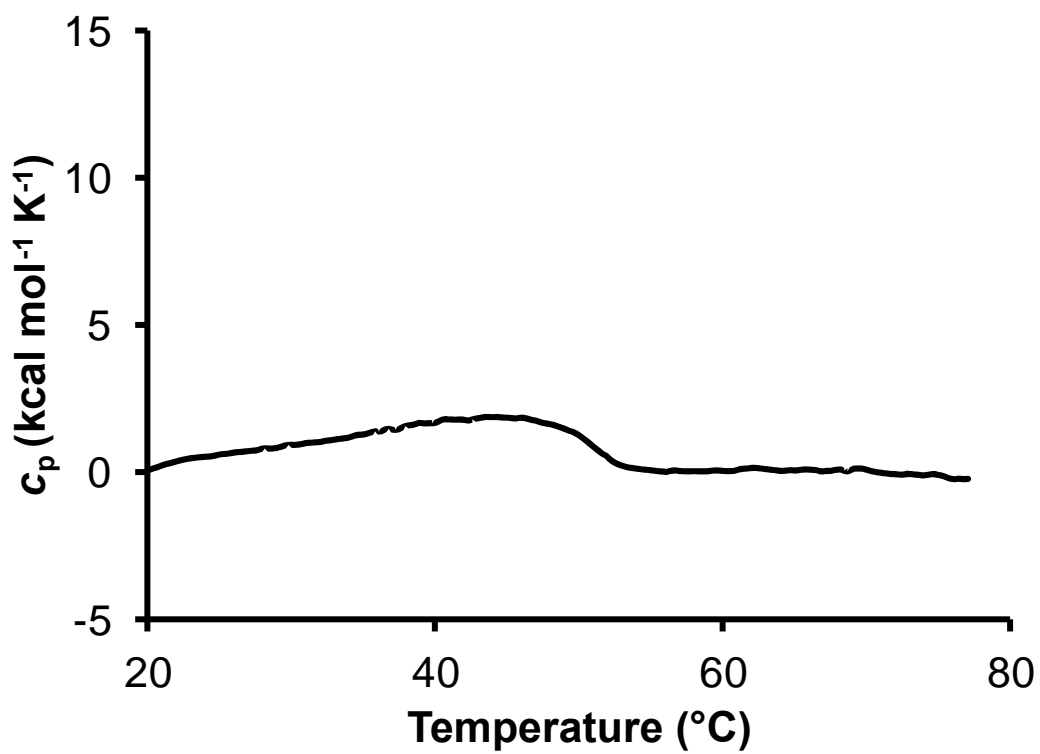

Figure S1. DSC profile of Mint3NT.

(a)

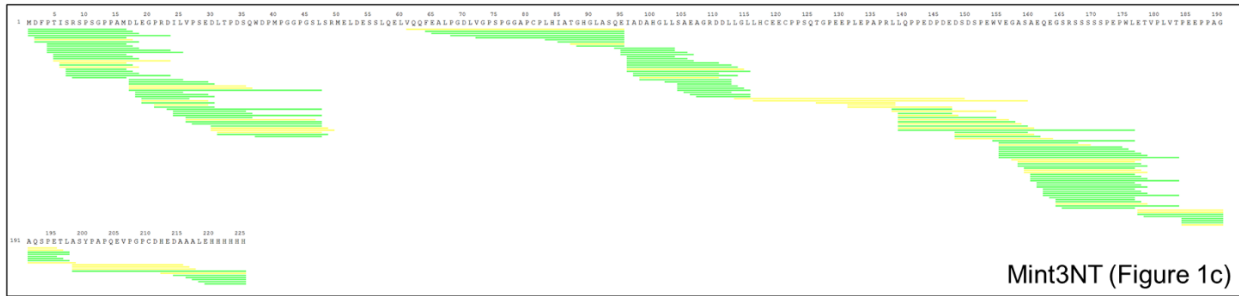

**Figure S2a.** Mint3NT peptides observed during sequence identification runs mapped onto the amino acid sequence of the protein in Figure 1c. Peptides are represented as green or yellow bars and aligned to their relative position along the primary sequence.

(b)

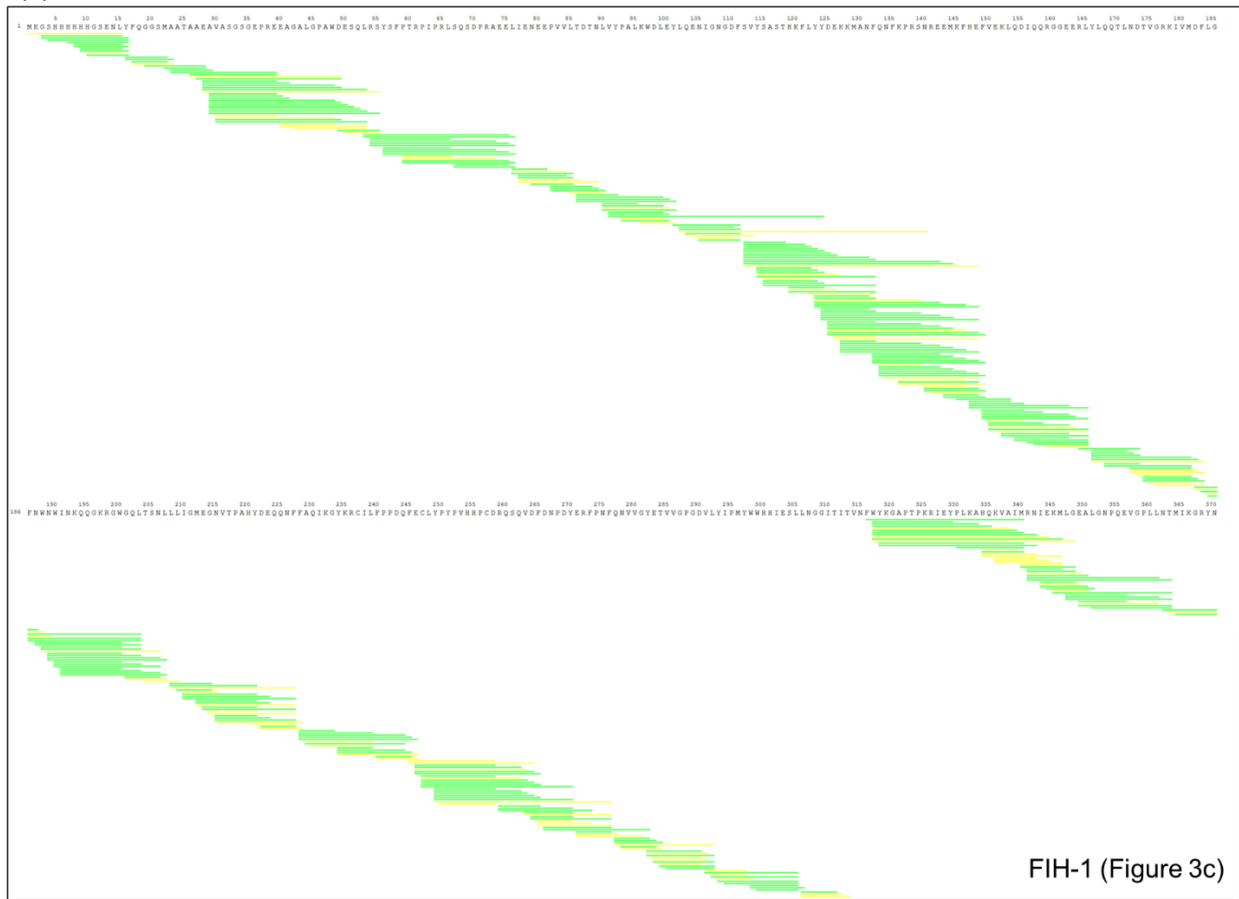

**Figure S2b.** FIH-1 peptides observed during sequence identification runs mapped onto the amino acid sequence of the protein in Figure 3c. Peptides are represented as green or yellow bars and aligned to their relative position along the primary sequence.



(c)

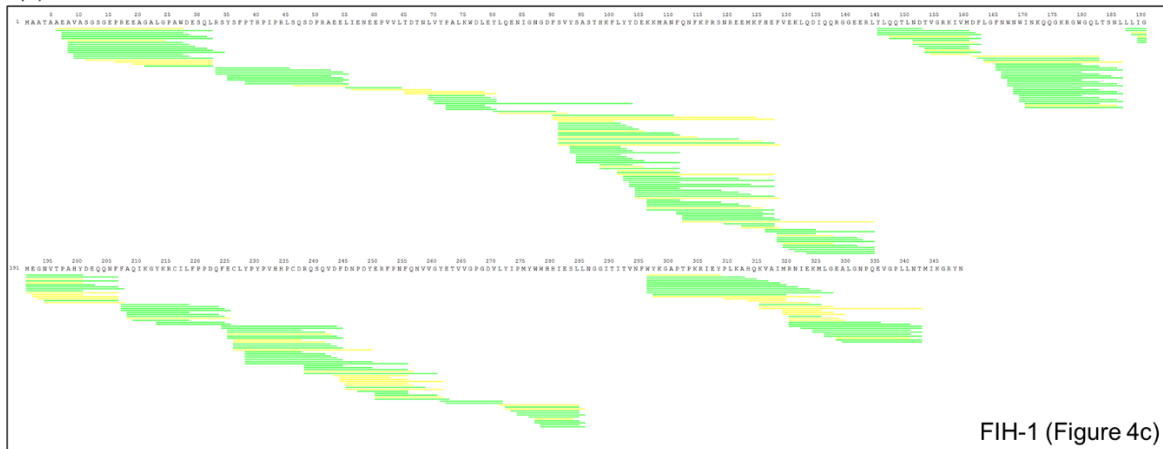

**Figure S2c.** FIH-1 peptides observed during sequence identification runs mapped onto the amino acid sequence of the protein in Figure 4c. Peptides are represented as green or yellow bars and aligned to their relative position along the primary sequence.

(d)

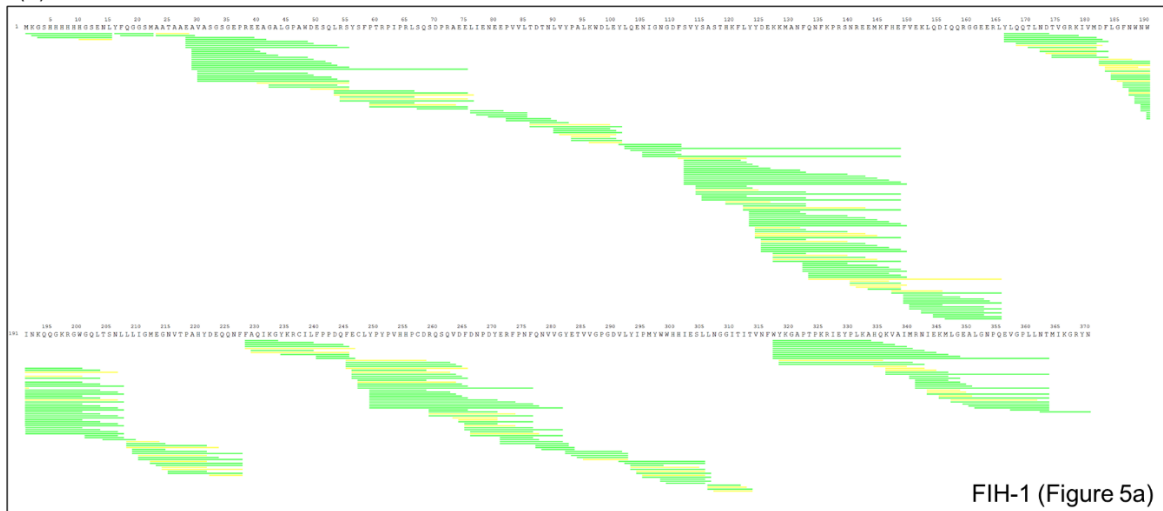

**Figure S2d.** FIH-1 peptides observed during sequence identification runs mapped onto the amino acid sequence of the protein in Figure 5a. Peptides are represented as green or yellow bars and aligned to their relative position along the primary sequence.

(e)

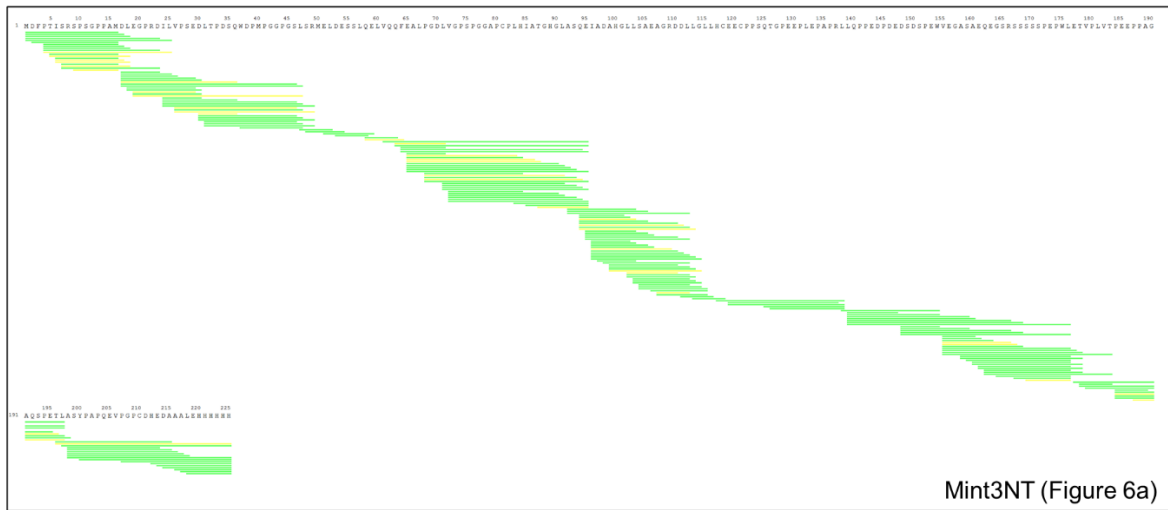

**Figure S2e.** Mint3NT peptides observed during sequence identification runs mapped onto the amino acid sequence of the protein in Figure 6a. Peptides are represented as green or yellow bars and aligned to their relative position along the primary sequence.

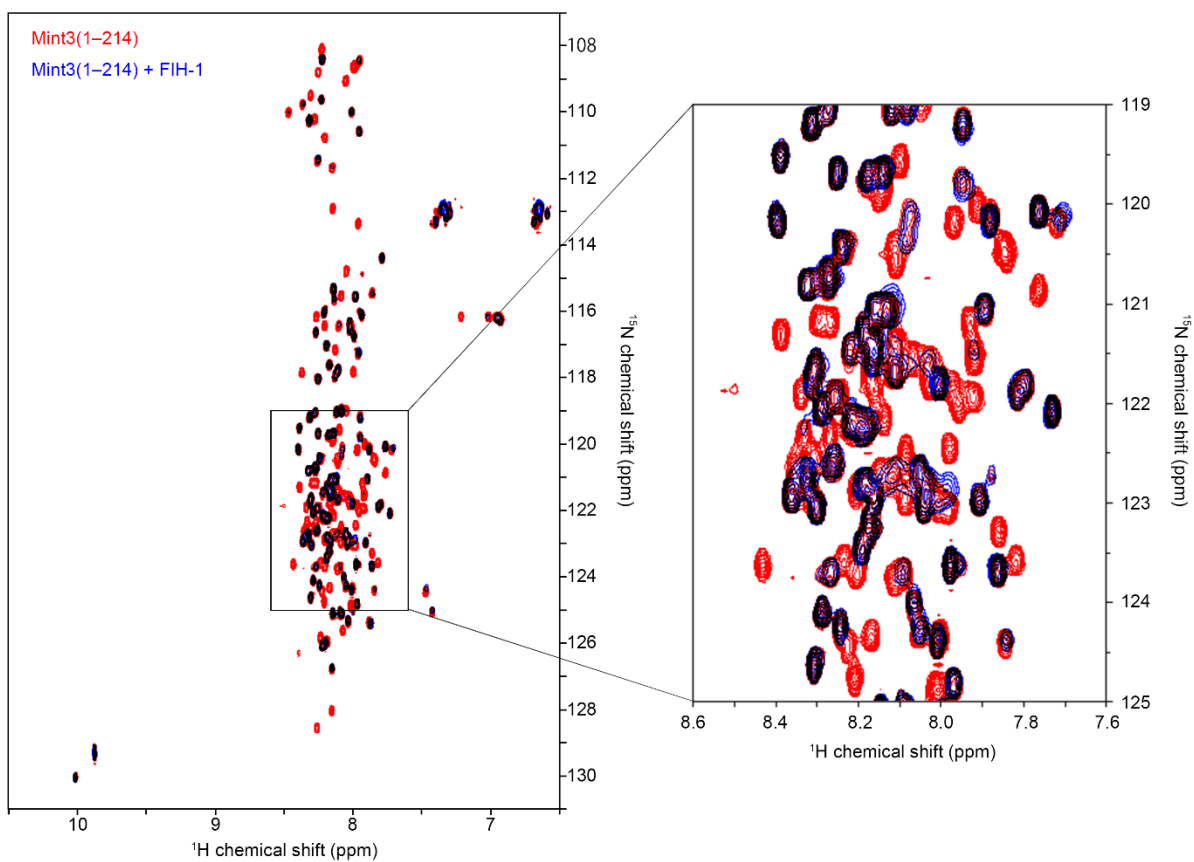

**Figure S3.**  $^1\text{H}$ - $^{15}\text{N}$  HSQC spectra of  $^{15}\text{N}$ -Mint3NT in the absence (red) and presence (blue) of equimolar concentration of unlabeled FIH-1 dimer at pH 7.3 and 4°C. Note that two separately measured spectra were overlaid in “multiply blend mode”, resulting in that two peaks in the same intensity and position were apparently shown in black.

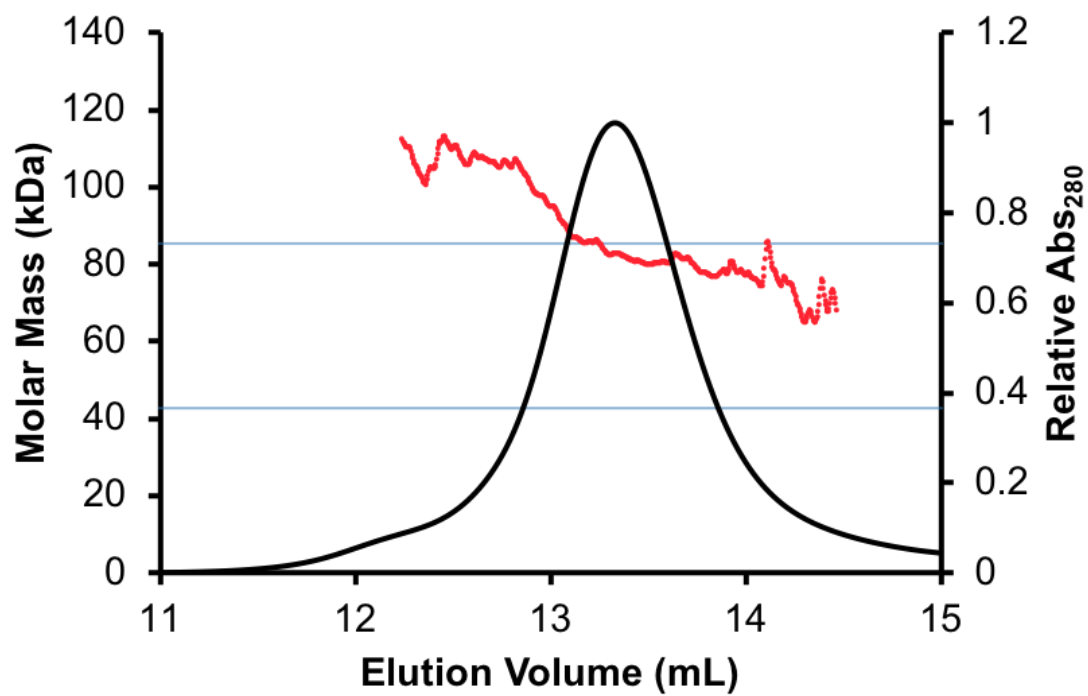

Figure S4. SEC-MALS profile of FIH-1.

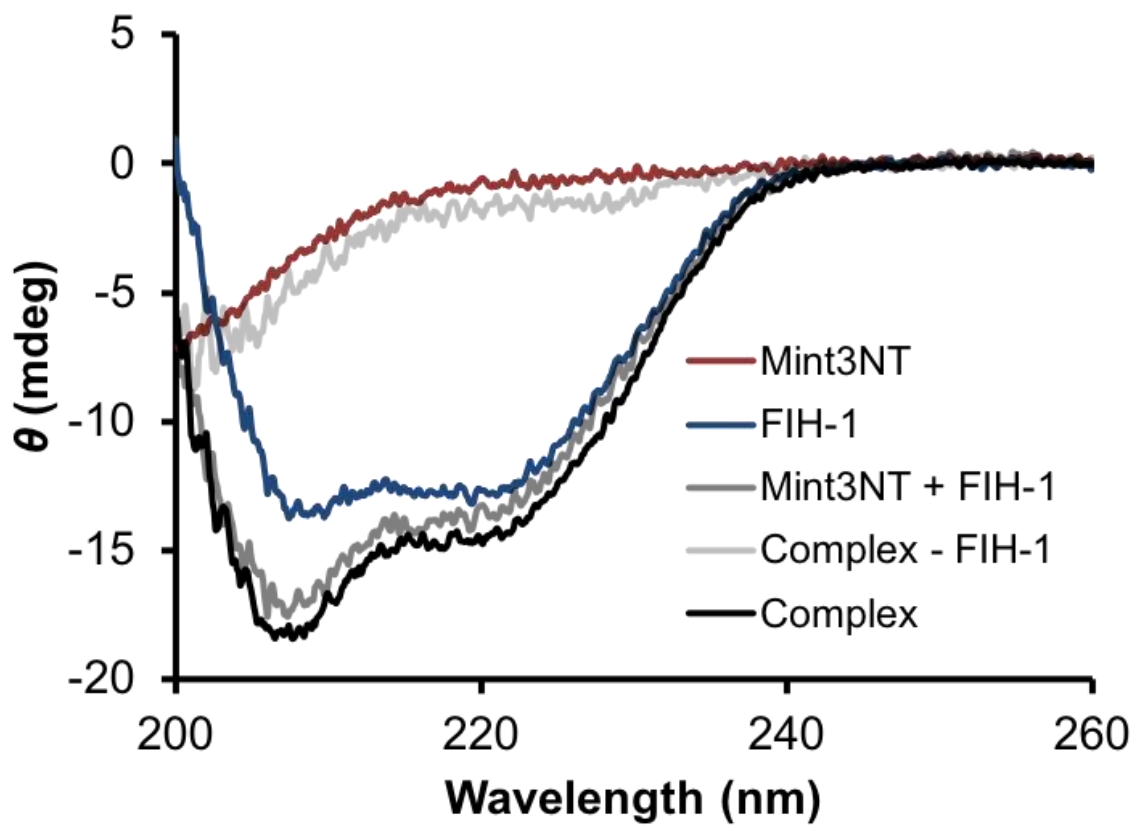

**Figure S5.** CD spectra of Mint3NT alone (red), FIH-1 alone (blue), complex between Mint3NT and FIH-1 (black), sum of spectra of Mint3NT and FIH-1 (dark gray), spectrum of the complex minus the spectrum of FIH-1 (white gray).

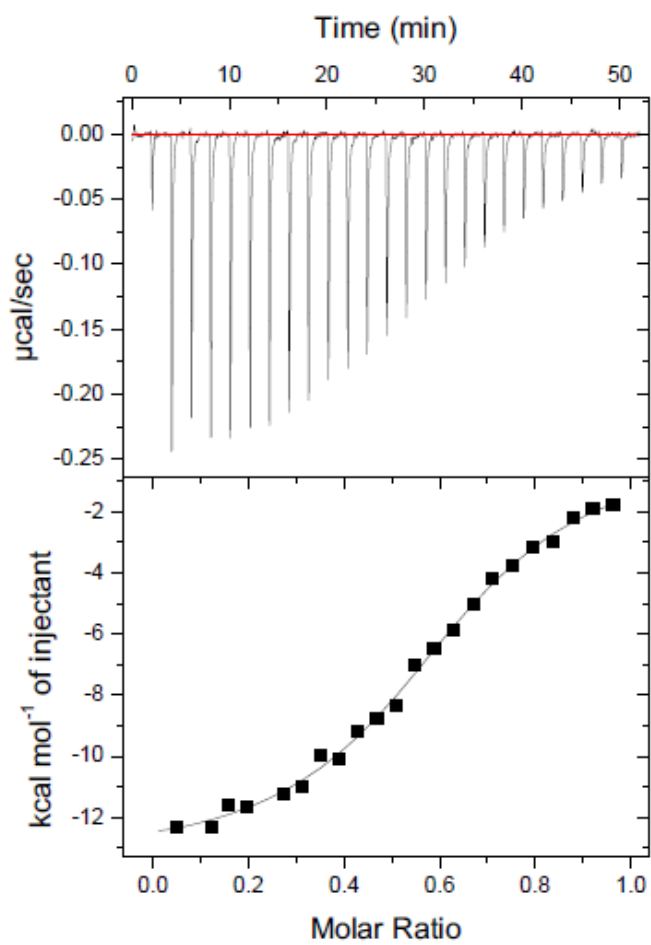

**Figure S6.** ITC profile of the interaction between FIH-1 and Mint3NTmut.

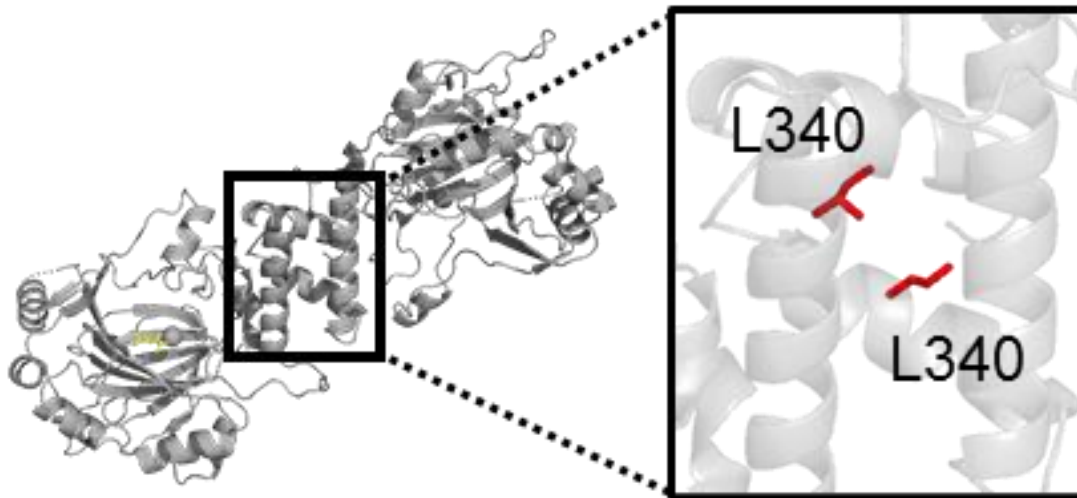

**Figure S7.** Mutation site of L340R shown in red (PDB ID: 1MZF).

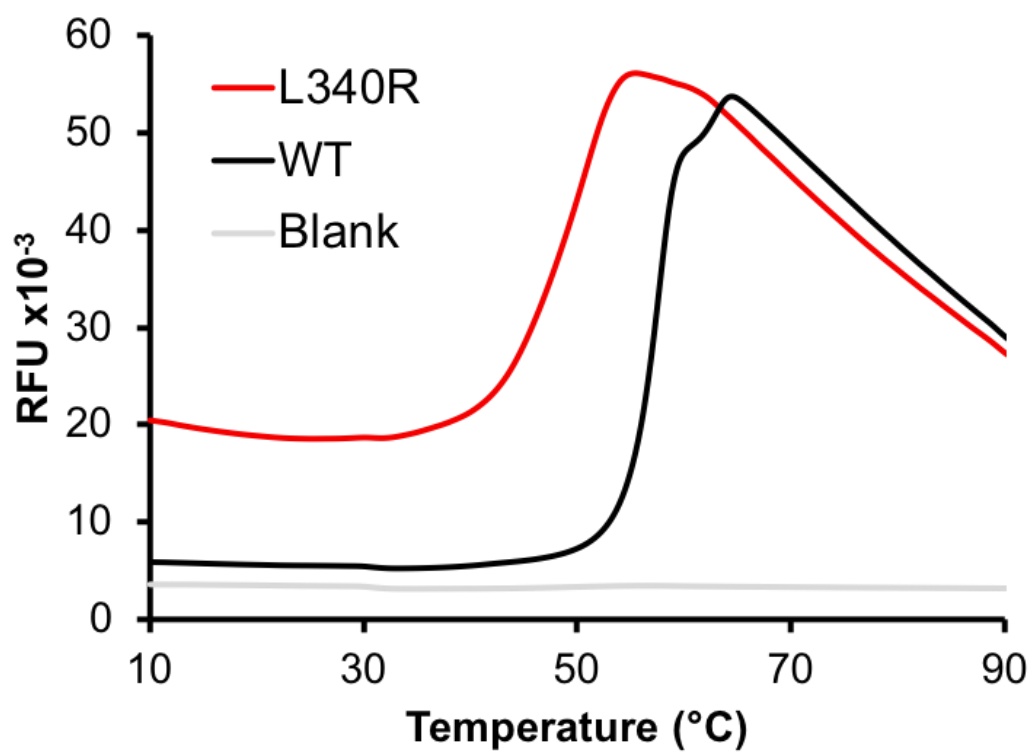

**Figure S8.** Melting curve of FIH-1 WT and FIH-1 L340R upon analysis using DSF.



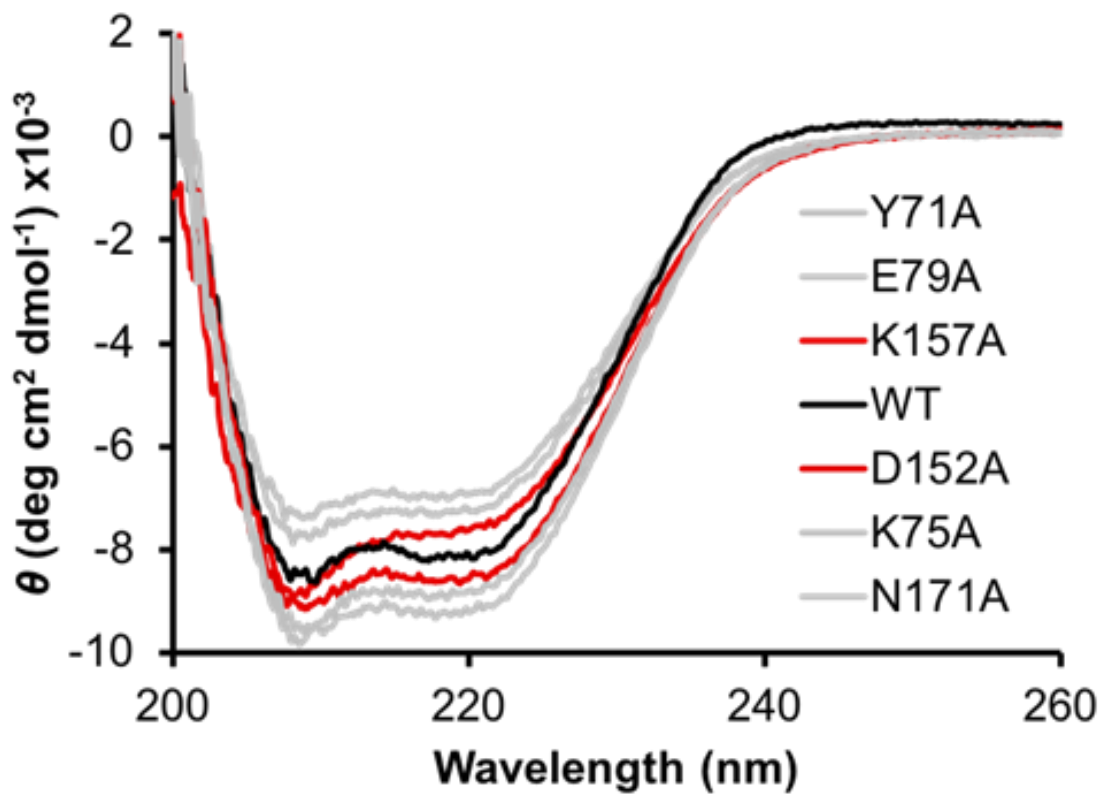

Figure S9. CD spectra of FIH-1 mutants.

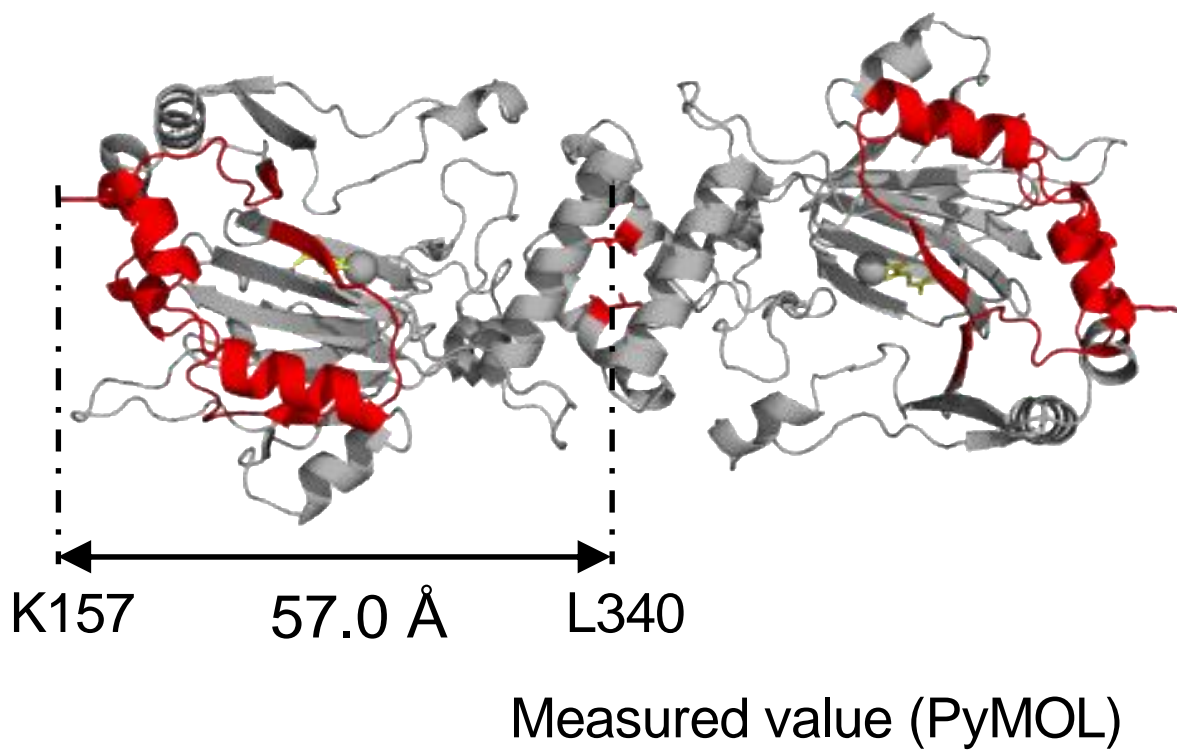

**Figure S10.** Size of the FIH-1 dimer calculated using Pymol software (PDB ID: 1MZF).
